# Supplementary material for: Comparative Physiological and Transcriptomic Analyses of Improved Heat Stress Tolerance in Celery (Apium Graveolens L.) Caused by Exogenous Melatonin
Source: MDPI journal article supplement (doi:10.3390/ijms231911382), 2022-09-27
Supplement: s1 [file s1]

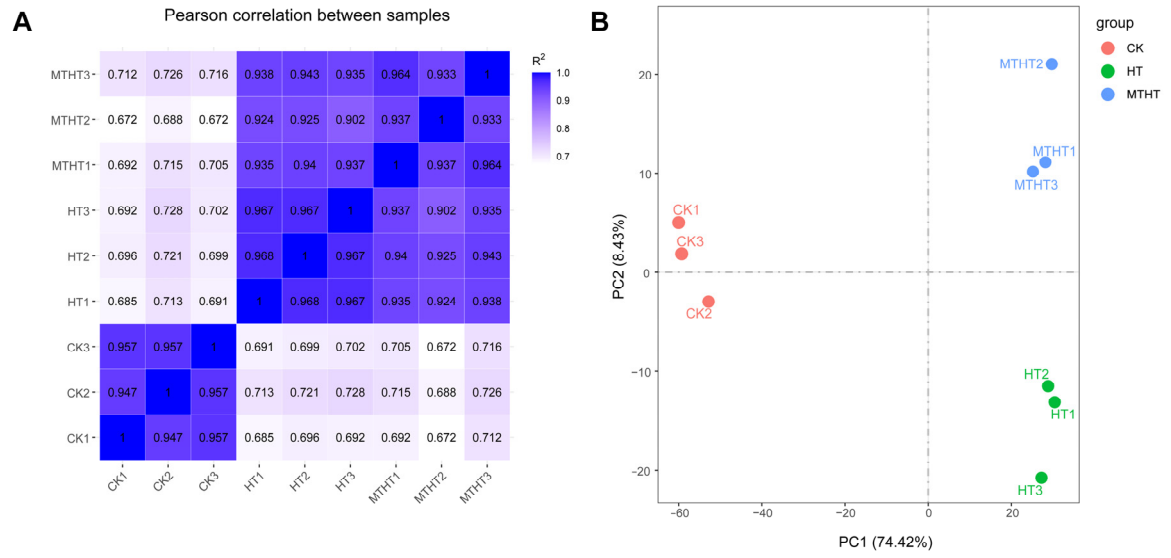

**Figure S1.** (A) Pearson coefficients (PCCs) of gene expression under different treatments (CK, HT, and MTHT) for three replicates presented. (B) PCA score plots of transcriptome data for three groups.
