# Supplementary material for: Comparative Physiological and Transcriptomic Analyses of Improved Heat Stress Tolerance in Celery (Apium Graveolens L.) Caused by Exogenous Melatonin
Source: Int J Mol Sci. 2022 Sep 27;23(19):11382. doi: 10.3390/ijms231911382 (PMC9569527; doi:10.3390/ijms231911382)
Supplement: Supplementary file 1 [file ijms-23-11382-s001.zip › Table S1.xlsx]

## Sheet: Sheet1
Table S1. Summary of sequencing data of all samples
Sample	raw	raw	clean	clean	error	Q20	Q30	GC	total
	reads	bases	reads	bases	rate			content	map
CK1	46655882	7G	45496936	6.82G	0.03	96.96	91.78	42.53	42484155(93.38%)
CK2	47113678	7.07G	46093056	6.91G	0.03	97	91.87	42.56	43171984(93.66%)
CK3	45085386	6.76G	44197430	6.63G	0.03	97.07	92.02	42.41	41480472(93.85%)
HT1	46033246	6.9G	45028450	6.75G	0.03	96.91	91.55	42.36	40775037(90.55%)
HT2	47019176	7.05G	46068932	6.91G	0.03	96.78	91.42	42.3	41280729(89.61%)
HT3	44450664	6.67G	44042520	6.61G	0.03	96.79	91.38	42.15	40265173(91.42%)
MTHT1	44854704	6.73G	44063978	6.61G	0.03	96.87	91.54	42.25	40014627(90.81%)
MTHT2	45160290	6.77G	44105122	6.62G	0.03	96.99	91.84	42.82	38477194(87.24%)
MTHT3	45090102	6.76G	44083084	6.61G	0.03	96.9	91.63	42.43	39430381(89.45%)
