# Supplementary material for: Comparative Physiological and Transcriptomic Analyses of Improved Heat Stress Tolerance in Celery (Apium Graveolens L.) Caused by Exogenous Melatonin
Source: Int J Mol Sci. 2022 Sep 27;23(19):11382. doi: 10.3390/ijms231911382 (PMC9569527; doi:10.3390/ijms231911382)
Supplement: Supplementary file 1 [file ijms-23-11382-s001.zip › Table S2.xlsx]

## Sheet: Sheet1
Table S2. Control of enzymes and their coding genes in metabolic pathways
Pathway name	BriteID	Enzymes	GeneID
Pyruvate metabolism	1.11.1.7	peroxidase	Ag7G01433
			novel.1303
			Ag11G03456
			Ag3G01932
			Ag5G02338
			novel.3975
			Ag8G01102
			Ag2G02687
			Ag7G00597				`
			Ag1G00772
	3.2.1.21	beta-glucosidas	Ag3G00715
			Ag4G00085
			Ag1G01485
	1.1.1.195	cinnamyl-alcohol dehydrogenase	novel.720
	1.2.1.44	cinnamoyl-CoA reductase	novel.3452
	1.14.14.91	trans-cinnamate 4-monooxygenase	Ag2G01159
Phenylpropanoid biosynthesis	2.7.1.90	Phosphofructokinase-1	Ag3G00009
	2.7.2.3	phosphoglycerate kinase	Ag2G02987
	2.7.1.40	pyruvate kinase	Ag2G02950
	1.2.4.1	pyruvate dehydrogenase (acetyl-transferring)	Ag3G01239
	2.3.3.8	ATP citrate synthase	Ag1G01316
	4.2.1.3	aconitate hydratase	Ag2G00170
			Ag9G00972
	1.1.1.42	isocitrate dehydrogenase (NADP+)	Ag10G02317
			Ag10G02966
	1.1.1.37	malate dehydrogenase	Ag4G00362
			Ag5G00615
			Ag4G01181
	6.4.1.2	acetyl-CoA carboxylase	novel.399
			Ag7G01984
	3.6.1.7	acylphosphatase	Ag3G02667
	1.2.1.3	aldehyde dehydrogenase (NAD+)	Ag1G00760
	1.1.1.1	alcohol dehydrogenase	Ag6G01932
	3.1.3.5	5'-nucleotidase	novel.1936
	1.1.1.40	malate dehydrogenase (oxaloacetate-decarboxylating)	novel.4137
			novel.3967
			AgUnG00717
	4.1.1.31	phosphoenolpyruvate carboxylase	Ag11G03183
