# Supplementary material for: Comparative Physiological and Transcriptomic Analyses of Improved Heat Stress Tolerance in Celery (Apium Graveolens L.) Caused by Exogenous Melatonin
Source: Int J Mol Sci. 2022 Sep 27;23(19):11382. doi: 10.3390/ijms231911382 (PMC9569527; doi:10.3390/ijms231911382)
Supplement: Supplementary file 1 [file ijms-23-11382-s001.zip › Table S3.xlsx]

## Sheet: Sheet1
Table S3. RT-qPCR primer sequences of genes
Gene	Primer sequence (5’ to 3’)
AgTUB	F: TGGTGGCACTGGATCTGGTATGG				R: ACTTTCGGAGGAGGGAAGACTGAA
Ag3G00009	F: ACCAAGTGCTATTCAGCGACCC				R: TGAGTTGAAGGCCGTGCAATCC
Ag2G02987	F: CAGTGTTCAACGCAGGCTTCCA				R: GTCTGAGCTGCAAGGCGTATCC
Ag2G02950	F: CTCCTGGACTTGTTGCCTTGCT				R: ACTGCCTTTGGGTCTGGGATCT
Ag3G01239	F: ATGCTGTTGCTTTGGCGAATGG				R: TGACGGATCAGAACCACCACCA
Ag9G00972	F: GGAGCTGTGCAATGCGTTGTTG				R: CCAGGAAGCCATGCTGCTACAA
Ag10G02317	F: ACATTACAGGCGGCGCTTATGG				R: ACTTCCTCCACCACCTCCTCTG
Ag4G00362	F: ACCTCTGCTGCCCATCTTCTCA				R: AACCCGACGAACTTTGGCTTCC
Ag11G03183	F: TTTGGATCACGCACCCGTAACG				R: CGACAACACGAGCAGCCTCATC
Ag7G01433	F:GGGTAGATGTGGGTTGCCTTCC				R: CGCCCAAATTGCTAACCGAGGA
Ag2G02687	F:GCCTCTCAGTCACAACCAGCTT				R: CCTTCCTCCTTGGTGCCATTCT
Ag7G00597	F: TTGTGCCGAGGCAGAGAAGGTT				R: CCGTACCGCTGACGAAGCAATG
Ag1G00772	F: TGGTGCTGTAGCAGGAGTTGGT				R: CAGGGTCTGGGTCCCTAATAGC
Ag3G00715	F: TGCCGCAACGAGGTACAAGGA				R: CCTGGCTTCAACTCGCTGACTT
novel.720	F: GGGTGGAGAGACCAGCACAAAC				R: ACCAACACAAGCAGCCTCTAGC
Ag11G03456	F: GCCAGCCACTGTCACTTCTCAT				R: ATCAGCAACAGCCTCCACCAAG
Ag2G01159	F: ACACCTCCAACGCCACAAGATG				R: GCTGTGTCAACACGCCGTAGAA
